# Supplementary material for: Investigation of Mixture Modelling Algorithms as a Tool for Determining the Statistical Likelihood of Serological Exposure to Filariasis Utilizing Historical Data from the Lymphatic Filariasis Surveillance Program in Vanuatu
Source: PubMed Central journal article supplement (PMC6473238; doi:10.3390/tropicalmed4010045), 2019-03-08
Supplement: tropicalmed-04-00045-s001.pdf [file tropicalmed-04-00045-s001.pdf]

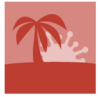

Article

# Investigation of Mixture Modelling Algorithms as A Tool for Determining Statistical Likelihood of Serological Exposure to Filariasis Utilizing Historical Data from the Lymphatic Filariasis Surveillance Program in Vanuatu

Hayley Joseph <sup>1,2,\*</sup>, Sarah Sullivan <sup>3</sup>, Peter Wood <sup>4,5</sup>, Wayne Melrose <sup>4</sup>, Fasiah Taleo <sup>6</sup> and Patricia Graves <sup>4</sup>

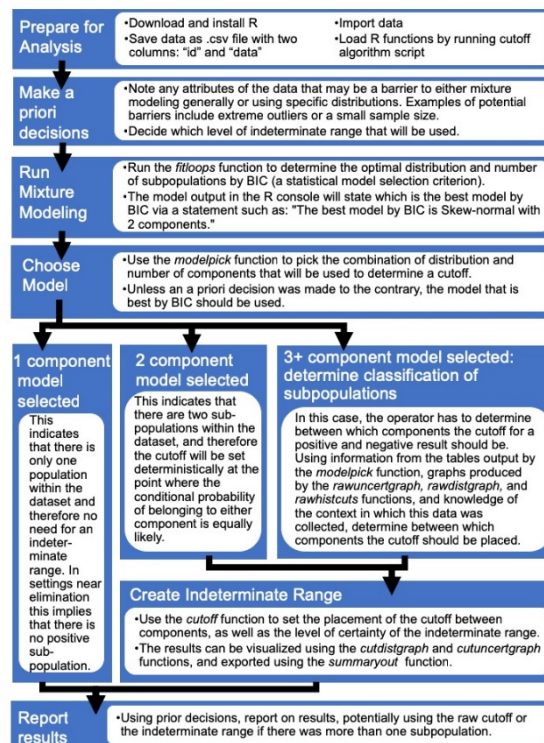

Figure S1. Step-by step guide to mixture modelling algorithms.
